# Supplementary material for: asb5a/asb5b Double Knockout Affects Zebrafish Cardiac Contractile Function
Source: MDPI journal article supplement (doi:10.3390/ijms242216364), 2023-11-15
Supplement: s1 [file s1]

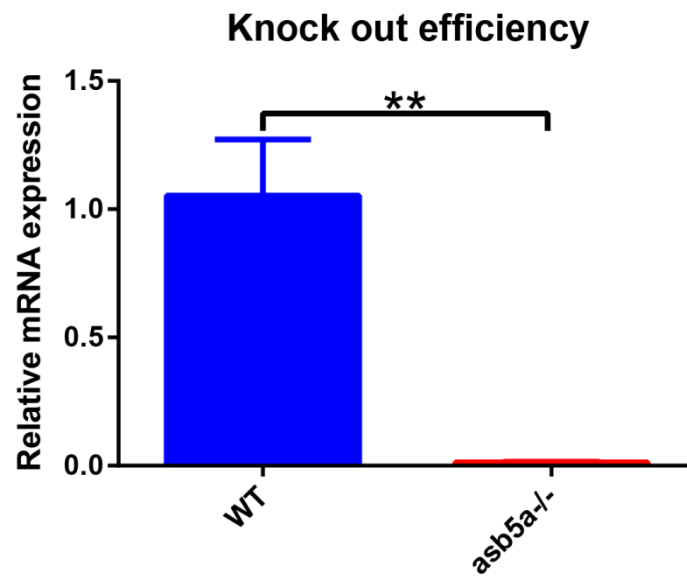

**FigureS1.** Validation of *asb5a* gene knockout efficiency in zebrafish. The expression level of *asb5a*-mRNA in 48hpf homozygous embryos was identified by qPCR. Plotted data represent means  $\pm$  standard error of the mean (SEM; n = 10, N=3). \*\* p < 0.01.

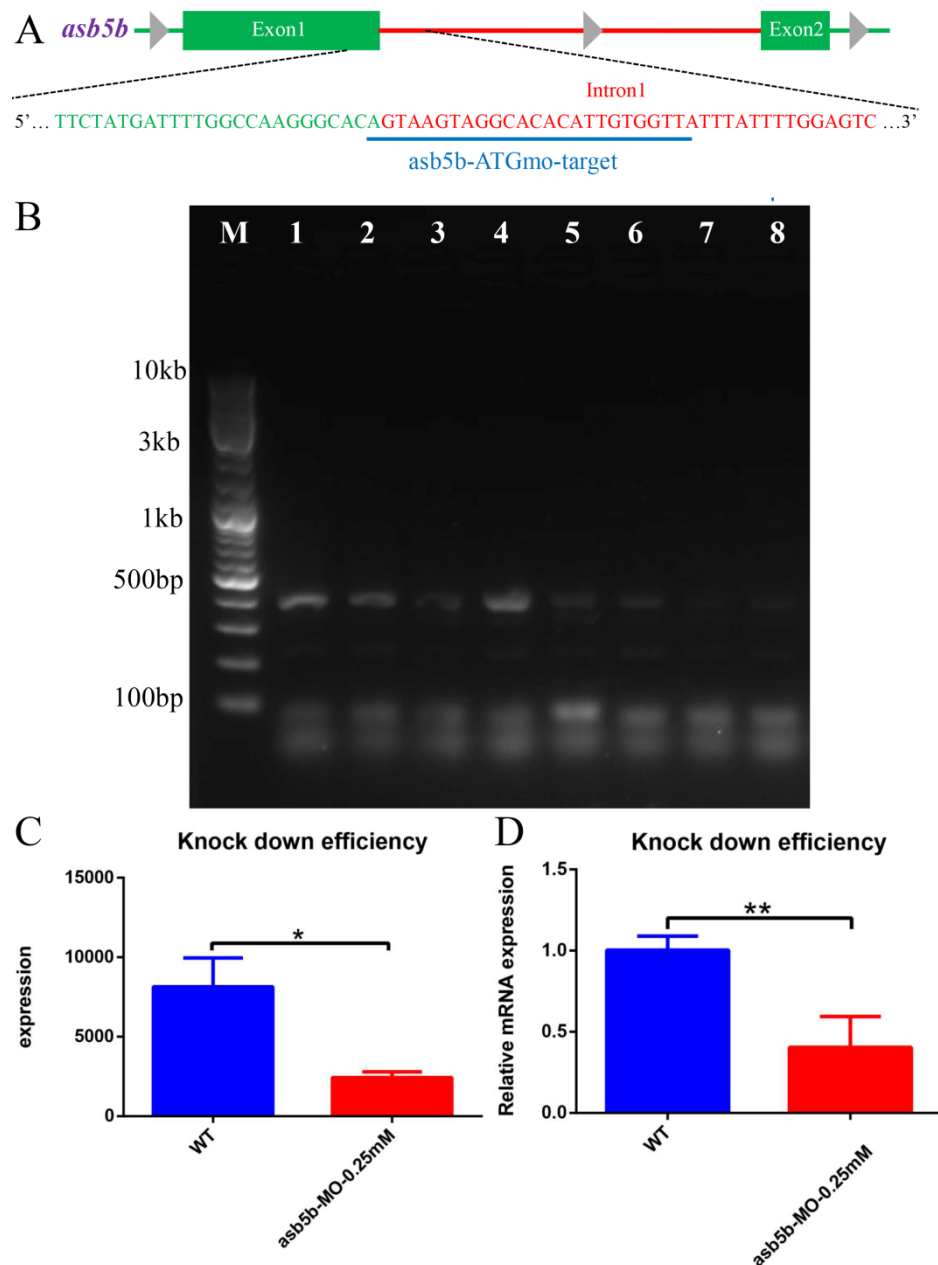

**Figure S2.** Identification of *asb5b* gene morpholino knockdown in zebrafish. **(A)** Target site design schematic of *asb5b*-ATGmo. Green represents the exons region, red represents the introns region, and blue represents the target site region. **(B)** The expression of *asb5b*-mRNA in 48hpf embryos was identified by RT-PCR. M: DNA marker bands; 1-4: Four biological replicates of WT, 5-8: Four biological replicates of *asb5b*-ATGmo-0.25 mM were injected at the WT embryo one-cell stage. **(C)** Results of gray scale analysis electrophoresis. The results showed that at a low concentration of 0.25 mM, effectiveness knockdown of *asb5b*-mRNA expression levels compared with the WT group. **(D)** qPCR identified *asb5b*-mRNA expression levels in 48hpf WT embryos after injection of 0.25 mM low concentration *asb5b*-ATGmo. Plotted data represent means  $\pm$  standard error of the mean (SEM; n = 10, N=4). \* p < 0.05; \*\* p < 0.01.

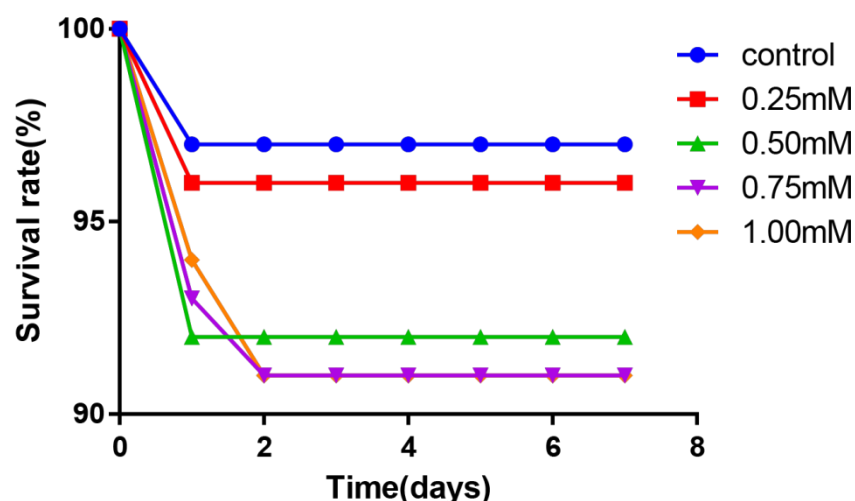

**Figure S3.**Survival curve of zebrafish with *asb5b*-ATGmo knockdown. Compared with WT Group, all the embryos with different injection concentration were broken membrane, normal body shape and heart development after 3dpf. Overall survival rates were above 90%, as shown above.

**Table S1:** Primers used for gene knockout and their sequences.

| Primer      | Sequences (5'→3')                                             |
|-------------|---------------------------------------------------------------|
| sgRNA-F1    | tgTAATACGACTCACTATAGGgaatggcctgtactcctctgGTTTTAGAGCTAGAAATAGC |
| sgRNA-F2    | tgTAATACGACTCACTATAGGagtctatgacaatgggtcaaGTTTTAGAGCTAGAAATAGC |
| sgRNA-R     | aaGCACCGACTCGGTGCCACT                                         |
| asb5a -KO-F | ACTAGACATTTTGTATATAAACTTAT                                    |
| asb5a -KO-R | GTGCCCTTTAAATCTATTTTGT                                        |

Note: tg was the protective base, and the sequence of T7 promoter was TAATACGACTCACTATA. GG was added to improve the transcription efficiency of T7 promoter. The horizontal part of the base is the target site sequence, GTTTTAGAGCTAGAAATAGC is the upstream of the sgRNA backbone sequence, and aa is the protective base.

**Table S2:** *asb5b*-ATGmo concentration gradient design.

| <i>asb5b</i> -ATGmo | Nuclease-Free Water | Final concentration                 |
|---------------------|---------------------|-------------------------------------|
| Original fluid      |                     |                                     |
| 1μL                 | 3μL                 | 0.25milliMolar(About 1.2 ng/embryo) |
| 1μL                 | 1μL                 | 0.50milliMolar(About 2.5 ng/embryo) |
| 3μL                 | 1μL                 | 0.75milliMolar(About 3.6 ng/embryo) |
| 1μL                 | 0μL                 | 1.00milliMolar(About 4.9 ng/embryo) |

Note: *asb5b*-MO powder 300 nanomoles (about 2.5 mg) . ADD 0.3 ml Nuclease-Free

Water (about 8.33 ug/ul) to the powder. About 1,700 embryos can be injected per 1 ul of solution.

**Table S3:** Primers used for WISH and their sequences.

| Primer                                     | Sequences (5'→3')                                |
|--------------------------------------------|--------------------------------------------------|
| <i>asb5a</i> -WISH-Fagttcctatgtgccgcaagctg |                                                  |
| <i>asb5a</i> -WISH-T7R                     | CCCTAATACGACTCACTATAGGGttatctgtattgtagaaagttcttc |
| <i>asb5b</i> -WISH-Fggcctttcggctctaatacca  |                                                  |
| <i>asb5b</i> -WISH-T7R                     | CCCTAATACGACTCACTATAGGGttatctgtattgaaggaagc      |

**Table S4:** Primers used for qPCR and their sequences.

| Primer                                     | Sequences (5'→3')      |
|--------------------------------------------|------------------------|
| <i>actb1</i> -qPCR-FTCCAGCCTTCCTTCCTGGGTAT |                        |
| <i>actb1</i> -qPCR- R                      | GTGGAAGGAGCAAGAGAGGTG  |
| <i>cox6a2</i> -qPCR-FACTGTCCTTCGTGTTAGCCC  |                        |
| <i>cox6a2</i> -qPCR-R                      | AGTGGGCAGAGCGTTTGTAT   |
| <i>cox7c</i> -qPCR-FACAAGCTGTTTCGTTCGGTTTG |                        |
| <i>cox7c</i> -qPCR-R                       | ATGAAGGGGAAGGCGAATCC   |
| <i>tnnc1a</i> -qPCR-FGGATGTTAGGCCAGAACCTT  |                        |
| <i>tnnc1a</i> -qPCR-R                      | TGGCTTCACCTGTAGCTTCC   |
| <i>tnnc1b</i> -qPCR-FCAGCGGTGGAGAACTTGACA  |                        |
| <i>tnnc1b</i> -qPCR-R                      | CGCACCATCATGACCAAGAAC  |
| <i>tnnt2a</i> -qPCR-FGATCGACGCAAACCTCTGGA  |                        |
| <i>tnnt2a</i> -qPCR-R                      | GGTCACTGACTCTGTTCTCTCA |
| <i>acta1a</i> -qPCR-FATGCCATCATGCGTTTGGAC  |                        |
| <i>acta1a</i> -qPCR-R                      | GGAAGCTCGTAGCTCTTTTCG  |
| <i>actc1a</i> -qPCR-FGGAAATGAGCGTTTCCGCTG  |                        |

---

|                          |                          |
|--------------------------|--------------------------|
| <i>actc1a</i> -qPCR-R    | GGCCAGAGCAGTGATTCCT      |
| <i>actc1b</i> -qPCR-F    | CAATGGCTCTGGCTTGGTCA     |
| <i>actc1b</i> -qPCR-R    | ACTTCAGGGTCAAGATACCTCTC  |
| <i>actc1c</i> -qPCR-F    | TATGTGGGAGACGAGGCTCA     |
| <i>actc1c</i> -qPCR-R    | CGGGAACGTTGAAGGTCTCA     |
| <i>cacng1a</i> -qPCR-F   | TGAGTCCTCGAGTGGAACAAT    |
| <i>cacng1a</i> -qPCR-R   | RGAAGAGGGCTATGGCAGCAC    |
| <i>cacng2a</i> -qPCR-F   | TGGCTGAAATGGTGGGTGT      |
| <i>cacng2a</i> -qPCR-R   | GAAGGTAGAGCCCCGAAACC     |
| <i>cacna1fb</i> -qPCR-F  | ACCCTACTGCTCTACAGGCG     |
| <i>cacna1fb</i> -qPCR-R  | GGCTTCTGCTTAAGGGCTCA     |
| <i>cacna2d1a</i> -qPCR-F | CCCATCGATTGGAGCCATCA     |
| <i>cacna2d1a</i> -qPCR-R | GGACCCAGGTTCTTAGGCTT     |
| <i>cacna2d2b</i> -qPCR-F | ACACCACAGTACAAGCTCGG     |
| <i>cacna2d2b</i> -qPCR-R | ATGTAGCGACTTGCCTCGTC     |
| <i>cacna2d3</i> -qPCR-F  | GGGCAAACTGGTGTCAATGG     |
| <i>cacna2d3</i> -qPCR-R  | GTGAGCTGCGGAGAAAAGATT    |
| <i>cacna2d4a</i> -qPCR-F | CAATTGGCCAGATCGCAAGG     |
| <i>cacna2d4a</i> -qPCR-R | GCACACTGTCCATGTAAGCC     |
| <i>cacna2d4b</i> -qPCR-F | GGCCTGACAAGAAGGTACGA     |
| <i>cacna2d4b</i> -qPCR-R | CTTGAACACCACACTGTCCATA   |
| <i>cacnb1</i> -qPCR-F    | GTCTCCTGAGCTGTTTGACA     |
| <i>cacnb1</i> -qPCR-R    | GAAGTGAGCACCTGTACCTGC    |
| <i>cacnb2a</i> -qPCR-F   | AAACAATTGGCGGTTTCAGC     |
| <i>cacnb2a</i> -qPCR-R   | ATGAGATTCCCGTTCCAGGC     |
| <i>tpma</i> -qPCR-F      | AGTACTCAGCTAAGGAGGACAAAT |
| <i>tpma</i> -qPCR-R      | CTCGCTGATGGCTTTGTACTTG   |
| <i>cox7b</i> -qPCR-F     | AGTCTCGACCGCTCATTTCC     |
| <i>cox7b</i> -qPCR-R     | RCTTCTGTGGAACAGCCACCT    |

---

---

|                                             |                       |
|---------------------------------------------|-----------------------|
| <i>myh7</i> -qPCR-FGGAGCAGCAGCTTCTTACCT     |                       |
| <i>myh7</i> -qPCR-RCTGGGGGTGAATGTCAGCTT     |                       |
| <i>cox5b</i> -qPCR-FGAGCTGTGGTTTTGCGTCAC    |                       |
| <i>cox5b</i> -qPCR-RTGAGGGTCTTGTGGAGCC      |                       |
| <i>cox8b</i> -qPCR-FATGTCCGGCTTCAATCGCT     |                       |
| <i>cox8b</i> -qPCR-R                        | GGATGGTCACAAACATGACCG |
| <i>uqcrc1</i> -qPCR-FCATCACATTCGGGGGTGGAA   |                       |
| <i>uqcrc1</i> -qPCR-R                       | TCGGTCACTGTGGTGCATAC  |
| <i>uqcrfs1</i> -qPCR-FGGGTCTACCCTTGTGGTTGG  |                       |
| <i>uqcrfs1</i> -qPCR-R                      | TTCTCTGTTCTGTGGCGGAC  |
| <i>myl4</i> -qPCR-FACAGAACGCCAGCAAGTGAA     |                       |
| <i>myl4</i> -qPCR-R                         | TGTGCCCTGATCTTTGGACC  |
| <i>uqcr10</i> -qPCR-FATGGCGCTCTCTAAAACGGT   |                       |
| <i>uqcr10</i> -qPCR-R                       | GTTTCCAGAGTTTCCCCCGA  |
| <i>cox7a2l</i> -qPCR-FAAGGGCAAATGTACCCTCCG  |                       |
| <i>cox7a2l</i> -qPCR-R                      | CTGTCTGGAACACCTCGCTT  |
| <i>cox6b2</i> -qPCR-FGATGCCCCGTTTCCCAAACAC  |                       |
| <i>cox6b2</i> -qPCR-R                       | CCCACCCAGCTAATTGGACA  |
| <i>asb5a</i> -qPCR-FTCATGAGGCCTGCCAATGTAA   |                       |
| <i>asb5a</i> -qPCR-R                        | TGCCCCAAATTCCAGCAAGA  |
| <i>asb5b</i> -qPCR-FCGTGGTTAAAGGAAATCGTAAGG |                       |
| <i>asb5b</i> -qPCR-R                        | TTTGCACTGTAACCCTGTGA  |

---

Note: Red highlights and yellow highlights are *asb5a<sup>-/-</sup>:asb5b*-ATGmo double knockout group compared with the WT group analyzed the enriched top 20hub genes using STRING database and Cytoscape software; Red highlights and green highlights are *asb5a<sup>-/-</sup>:asb5b*-ATGmo double knockout group compared with the *asb5a<sup>-/-</sup>*-group analyzed the enriched top 20hub genes using STRING database and Cytoscape software.
